# Supplementary material for: The preparation of a difunctional porous β-tricalcium phosphate scaffold with excellent compressive strength and antibacterial properties
Source: Royal Society of Chemistry journal article supplement (doi:10.1039/d0ra02388d), 2020-01-01
Supplement: d0ra02388d1.pdf [file d0ra02388d1.pdf]

## **The Preparation of A Difunctional Porous $\beta$ -tricalcium phosphate Scaffold with Excellent Compressive Strength and Antibacterial Properties**

Long Qin<sup>a</sup>, Jiang Yi<sup>a</sup>, Lai Xuefei<sup>a</sup>, Liao Li<sup>a</sup>, Xie Kenan<sup>a</sup>, Xie Lu<sup>b,\*</sup>

<sup>a</sup> School of Chemical Engineering, Sichuan University, Chengdu, 610065, China.

<sup>b</sup> State Key Laboratory of Oral Diseases & National Clinical Research Center for Oral Diseases &  
Other Research Platforms & Dept. of Prosthodontic, West China Hospital of Stomatology,  
Sichuan University.

\*Email: [Xielu2017@163.com](mailto:Xielu2017@163.com) Tel.: 0086-15198002007

Supporting information

Fig. S.1. Ag<sup>+</sup> release curves of G- $\beta$ -TCP-Ag and G- $\beta$ -TCP-Ag-HAp. Each symbol indicates the means  $\pm$  standard errors for three observations.

Fig. S.2. Growth curves of E. coli (a) and S. aureus (b) with the effect of G- $\beta$ -TCP, G- $\beta$ -TCP-Ag, and G- $\beta$ -TCP-Ag-HAp. Each symbol indicates the means  $\pm$  standard errors for three observations.

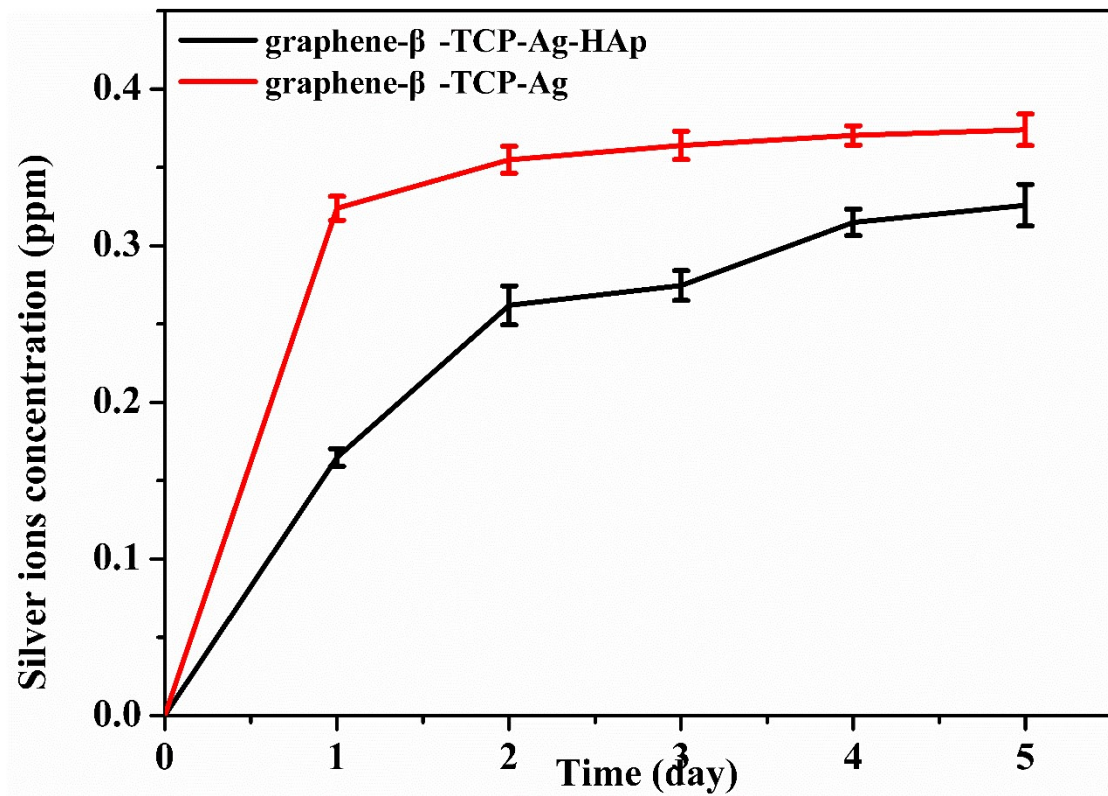

Fig. S.1. Ag<sup>+</sup> release curves of G-β-TCP-Ag and G-β-TCP-Ag-HAp. Each symbol indicates the means ± standard errors for three observations.

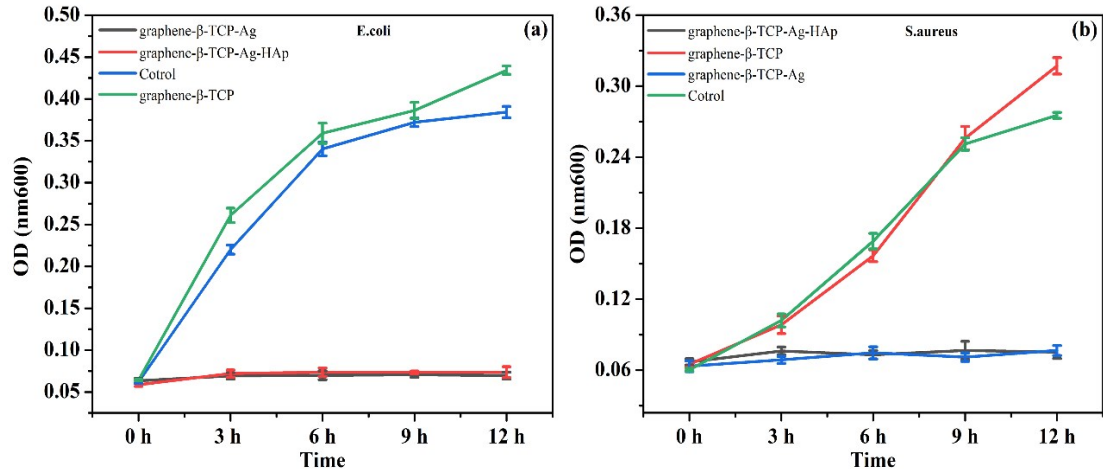

Fig. S.2. Growth curves of *E. coli* (a) and *S. aureus* (b) with the effect of G-β-TCP, G-β-TCP-Ag, and G-β-TCP-Ag-HAp. Each symbol indicates the means  $\pm$  standard errors for three observations.
